# Supplementary material for: LncRNA WAC-AS1 expression in human tumors correlates with immune infiltration and affects prognosis
Source: Springer Nature journal article supplement (doi:10.1186/s41065-023-00290-z), 2023-05-30

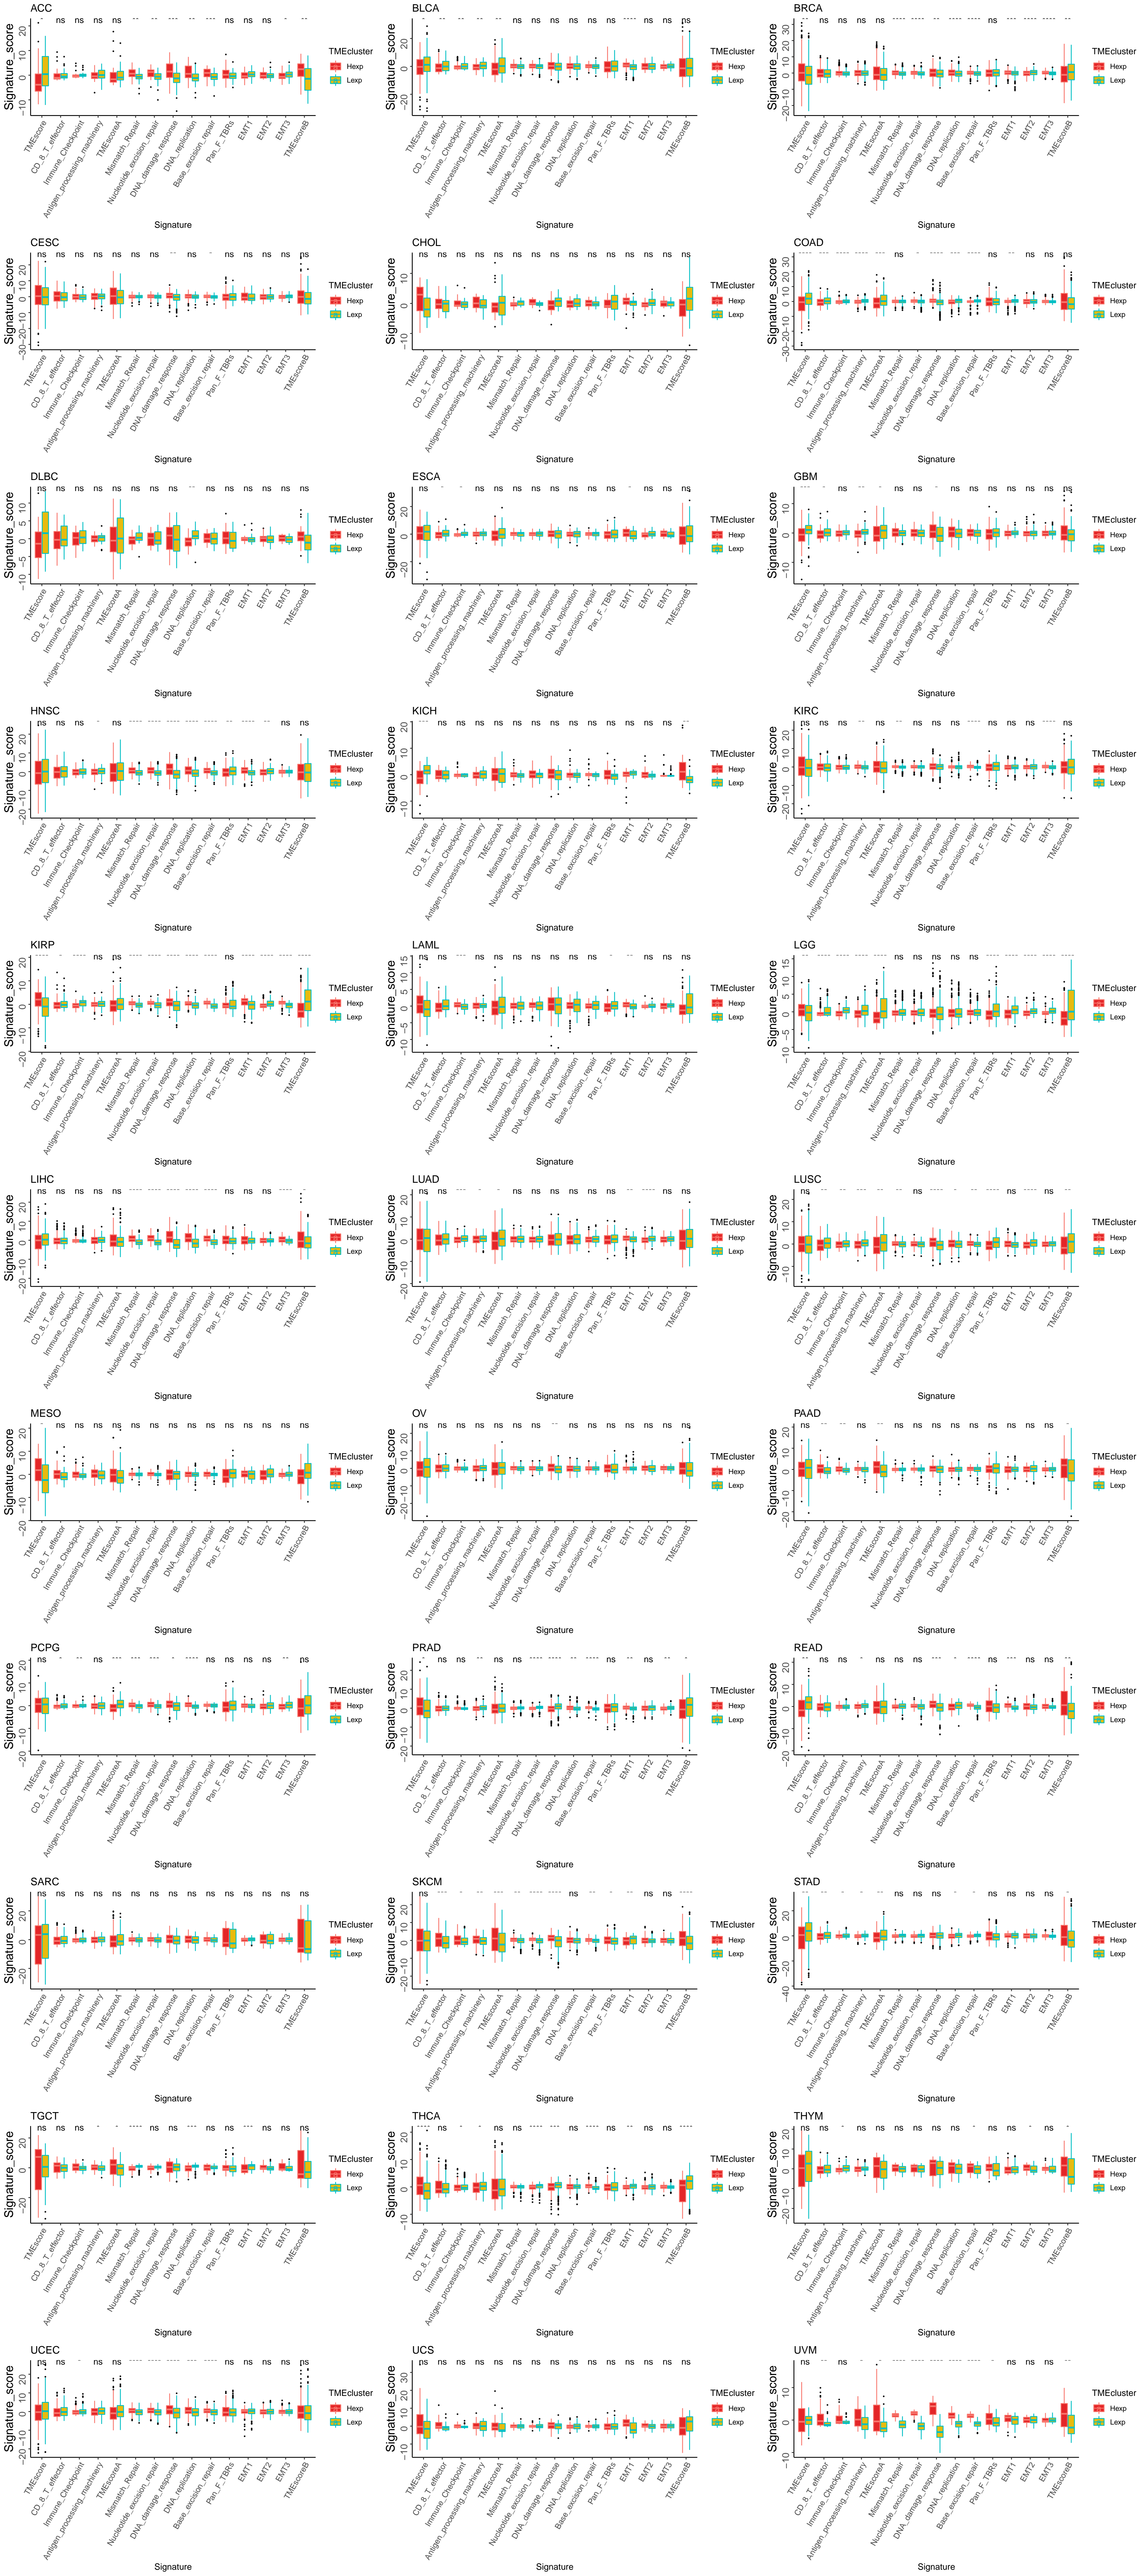

Supplement: MOESM3 [file 41065_2023_290_MOESM3_ESM.pdf]
