# Supplementary material for: LncRNA WAC-AS1 expression in human tumors correlates with immune infiltration and affects prognosis
Source: Springer Nature journal article supplement (doi:10.1186/s41065-023-00290-z), 2023-05-30
Supplement: MOESM7 [file 41065_2023_290_MOESM7_ESM.pdf]

Supplemental Table1.

Correlations of WAC-AS1 expression with tumor microenvironment scores by TIMER across 33 types of tumor.

| Cancer Type | Score Name    | cor         | p-Value     |
|-------------|---------------|-------------|-------------|
| ACC         | StromalScore  | -0.197007   | 0.081819517 |
| ACC         | ImmuneScore   | -0.16910046 | 0.136278735 |
| ACC         | ESTIMATEScore | -0.18858382 | 0.096027836 |
| ACC         | TumorPurity   | 0.12672594  | 0.265749108 |
| BLCA        | StromalScore  | -0.08268306 | 0.089429147 |
| BLCA        | ImmuneScore   | -0.21816037 | 5.95E-06    |
| BLCA        | ESTIMATEScore | -0.1601076  | 0.000951374 |
| BLCA        | TumorPurity   | 0.169683986 | 0.000456595 |
| BRCA        | StromalScore  | -0.16774489 | 1.21E-08    |
| BRCA        | ImmuneScore   | 0.006383601 | 0.829532721 |
| BRCA        | ESTIMATEScore | -0.08043793 | 0.006581262 |
| BRCA        | TumorPurity   | 0.074941867 | 0.01137013  |
| CESC        | StromalScore  | -0.00989229 | 0.862280086 |
| CESC        | ImmuneScore   | -0.0493225  | 0.386802376 |
| CESC        | ESTIMATEScore | -0.03651385 | 0.521841594 |
| CESC        | TumorPurity   | 0.027142912 | 0.634033479 |
| CHOL        | StromalScore  | 0.054946609 | 0.750268578 |
| CHOL        | ImmuneScore   | 0.033844072 | 0.844646247 |
| CHOL        | ESTIMATEScore | 0.044571941 | 0.796312976 |
| CHOL        | TumorPurity   | -0.02405861 | 0.88923107  |
| COAD        | StromalScore  | -0.13699989 | 0.001758147 |
| COAD        | ImmuneScore   | -0.29406787 | 8.21E-12    |
| COAD        | ESTIMATEScore | -0.22544545 | 2.10E-07    |
| COAD        | TumorPurity   | 0.18783414  | 1.65E-05    |
| DLBC        | StromalScore  | 0.084744263 | 0.566860842 |
| DLBC        | ImmuneScore   | -0.07438526 | 0.615337931 |
| DLBC        | ESTIMATEScore | 0.008203747 | 0.955867673 |
| DLBC        | TumorPurity   | -0.00654089 | 0.96480676  |
| ESCA        | StromalScore  | -0.05584115 | 0.477579941 |
| ESCA        | ImmuneScore   | -0.23279905 | 0.002701516 |
| ESCA        | ESTIMATEScore | -0.15588126 | 0.046241033 |
| ESCA        | TumorPurity   | 0.146616092 | 0.061016294 |
| GBM         | StromalScore  | -0.07013371 | 0.342811488 |
| GBM         | ImmuneScore   | -0.1202032  | 0.103149336 |
| GBM         | ESTIMATEScore | -0.10200595 | 0.167084208 |
| GBM         | TumorPurity   | 0.098680919 | 0.181427566 |
| HNSC        | StromalScore  | -0.17684144 | 6.34E-05    |
| HNSC        | ImmuneScore   | -0.11453096 | 0.009925093 |
| HNSC        | ESTIMATEScore | -0.16305401 | 0.000230128 |
| HNSC        | TumorPurity   | 0.167065446 | 0.000159805 |
| KICH        | StromalScore  | 0.057328451 | 0.650115312 |
| KICH        | ImmuneScore   | 0.008307628 | 0.947632793 |
| KICH        | ESTIMATEScore | 0.030924793 | 0.806809195 |
| KICH        | TumorPurity   | -0.01911689 | 0.879858523 |
| KIRC        | StromalScore  | -0.01358308 | 0.749945634 |
| KIRC        | ImmuneScore   | 0.081666468 | 0.054943071 |
| KIRC        | ESTIMATEScore | 0.045388485 | 0.286655399 |
| KIRC        | TumorPurity   | -0.01974886 | 0.643072235 |
| KIRP        | StromalScore  | -0.31405759 | 4.41E-08    |
| KIRP        | ImmuneScore   | -0.26416998 | 4.91E-06    |
| KIRP        | ESTIMATEScore | -0.30102998 | 1.65E-07    |
| KIRP        | TumorPurity   | 0.300399337 | 1.76E-07    |
| LAML        | StromalScore  | 0.083463804 | 0.308261528 |
| LAML        | ImmuneScore   | 0.100830503 | 0.217996925 |
| LAML        | ESTIMATEScore | 0.099822187 | 0.222657949 |

|      |               |             |             |
|------|---------------|-------------|-------------|
| LAML | TumorPurity   | -0.10007374 | 0.22148855  |
| LGG  | StromalScore  | -0.3858571  | 0           |
| LGG  | ImmuneScore   | -0.30853767 | 4.22E-14    |
| LGG  | ESTIMATEScore | -0.34906605 | 0           |
| LGG  | TumorPurity   | 0.334047689 | 2.22E-16    |
| LIHC | StromalScore  | -0.20705653 | 4.54E-05    |
| LIHC | ImmuneScore   | -0.15453514 | 0.002456273 |
| LIHC | ESTIMATEScore | -0.1926437  | 0.000151626 |
| LIHC | TumorPurity   | 0.172403078 | 0.000714598 |
| LUAD | StromalScore  | -0.23311863 | 1.79E-08    |
| LUAD | ImmuneScore   | -0.19829157 | 1.83E-06    |
| LUAD | ESTIMATEScore | -0.23215739 | 2.06E-08    |
| LUAD | TumorPurity   | 0.225916454 | 4.97E-08    |
| LUSC | StromalScore  | -0.24816796 | 1.75E-08    |
| LUSC | ImmuneScore   | -0.17759283 | 6.31E-05    |
| LUSC | ESTIMATEScore | -0.22373032 | 4.09E-07    |
| LUSC | TumorPurity   | 0.21383348  | 1.33E-06    |
| MESO | StromalScore  | -0.18751309 | 0.083835939 |
| MESO | ImmuneScore   | 0.036611737 | 0.737876102 |
| MESO | ESTIMATEScore | -0.06238871 | 0.568230676 |
| MESO | TumorPurity   | 0.056266929 | 0.60685319  |
| OV   | StromalScore  | -0.09703855 | 0.05712746  |
| OV   | ImmuneScore   | -0.13500023 | 0.007991342 |
| OV   | ESTIMATEScore | -0.12932546 | 0.011086118 |
| OV   | TumorPurity   | 0.124736124 | 0.014320838 |
| PAAD | StromalScore  | 0.075196284 | 0.315737004 |
| PAAD | ImmuneScore   | 0.21340699  | 0.004022145 |
| PAAD | ESTIMATEScore | 0.152603509 | 0.040842893 |
| PAAD | TumorPurity   | -0.1643988  | 0.027432905 |
| PCPG | StromalScore  | -0.26156031 | 0.000238521 |
| PCPG | ImmuneScore   | -0.31212344 | 9.92E-06    |
| PCPG | ESTIMATEScore | -0.30263724 | 1.89E-05    |
| PCPG | TumorPurity   | 0.274354188 | 0.000112905 |
| PRAD | StromalScore  | -0.03939433 | 0.376057944 |
| PRAD | ImmuneScore   | 0.015238948 | 0.732122769 |
| PRAD | ESTIMATEScore | -0.01075016 | 0.809193052 |
| PRAD | TumorPurity   | 0.004724718 | 0.915484854 |
| READ | StromalScore  | -0.12024976 | 0.119398998 |
| READ | ImmuneScore   | -0.27011297 | 0.000382811 |
| READ | ESTIMATEScore | -0.20272951 | 0.008207045 |
| READ | TumorPurity   | 0.175311543 | 0.022618303 |
| SARC | StromalScore  | -0.18729511 | 0.00195845  |
| SARC | ImmuneScore   | -0.09446929 | 0.120795358 |
| SARC | ESTIMATEScore | -0.14015227 | 0.02100273  |
| SARC | TumorPurity   | 0.115735186 | 0.057062225 |
| SKCM | StromalScore  | -0.02294153 | 0.617214659 |
| SKCM | ImmuneScore   | 0.075165964 | 0.101075369 |
| SKCM | ESTIMATEScore | 0.040786398 | 0.37409924  |
| SKCM | TumorPurity   | -0.05726576 | 0.21186766  |
| STAD | StromalScore  | -0.10103647 | 0.050578764 |
| STAD | ImmuneScore   | -0.19558437 | 0.000138011 |
| STAD | ESTIMATEScore | -0.16254317 | 0.001587715 |
| STAD | TumorPurity   | 0.155941196 | 0.002459718 |
| TGCT | StromalScore  | 0.149155645 | 0.053649918 |
| TGCT | ImmuneScore   | 0.278522112 | 0.000256467 |
| TGCT | ESTIMATEScore | 0.291077111 | 0.000129271 |
| TGCT | TumorPurity   | -0.30340992 | 6.39E-05    |
| THCA | StromalScore  | -0.13444648 | 0.00200026  |

|      |               |             |             |
|------|---------------|-------------|-------------|
| THCA | ImmuneScore   | -0.17596814 | 4.95E-05    |
| THCA | ESTIMATEScore | -0.17181069 | 7.48E-05    |
| THCA | TumorPurity   | 0.147771369 | 0.000674574 |
| THYM | StromalScore  | -0.08160096 | 0.377648182 |
| THYM | ImmuneScore   | 0.002303114 | 0.980167553 |
| THYM | ESTIMATEScore | -0.04321825 | 0.640716476 |
| THYM | TumorPurity   | 0.062257704 | 0.50117912  |
| UCEC | StromalScore  | -0.14669666 | 0.000447138 |
| UCEC | ImmuneScore   | -0.16913034 | 5.02E-05    |
| UCEC | ESTIMATEScore | -0.17837618 | 1.87E-05    |
| UCEC | TumorPurity   | 0.175326358 | 2.60E-05    |
| UCS  | StromalScore  | 0.000288715 | 0.998315018 |
| UCS  | ImmuneScore   | 0.008117752 | 0.952650629 |
| UCS  | ESTIMATEScore | 0.005137999 | 0.970020728 |
| UCS  | TumorPurity   | 0.014456765 | 0.915780738 |
| UVM  | StromalScore  | -0.21064462 | 0.060722178 |
| UVM  | ImmuneScore   | -0.02178486 | 0.847894354 |
| UVM  | ESTIMATEScore | -0.08692412 | 0.443266131 |
| UVM  | TumorPurity   | 0.026457037 | 0.815796082 |
