# Supplementary material for: LncRNA WAC-AS1 expression in human tumors correlates with immune infiltration and affects prognosis
Source: Springer Nature journal article supplement (doi:10.1186/s41065-023-00290-z), 2023-05-30
Supplement: MOESM8 [file 41065_2023_290_MOESM8_ESM-1.pdf]

Supplemental Table2.

Correlation of WAC-AS1 expression with immune cell infiltration in 33 types of tumor.

| Cancer Type | Cell Type                    | cor          | p-Value     |
|-------------|------------------------------|--------------|-------------|
| ACC         | B cells naive                | 0.099164824  | 0.532095814 |
| ACC         | B cells memory               | -0.060323188 | 0.704326359 |
| ACC         | Plasma cells                 | 0.073351056  | 0.644335242 |
| ACC         | T cells CD8                  | 0.361479497  | 0.018667211 |
| ACC         | T cells CD4 naive            | 0            | NA          |
| ACC         | T cells CD4 memory resting   | -0.409167448 | 0.007132446 |
| ACC         | T cells CD4 memory activated | 0.131594664  | 0.406134587 |
| ACC         | T cells follicular helper    | 0.29501311   | 0.057872941 |
| ACC         | T cells regulatory (Tregs)   | 0.03689013   | 0.816585187 |
| ACC         | T cells gamma delta          | -0.090194329 | 0.57000392  |
| ACC         | NK cells resting             | -0.028241124 | 0.859087941 |
| ACC         | NK cells activated           | 0.229561546  | 0.143619899 |
| ACC         | Monocytes                    | -0.217387085 | 0.166690789 |
| ACC         | Macrophages M0               | 0.239180886  | 0.127127207 |
| ACC         | Macrophages M1               | 0.348473685  | 0.023720671 |
| ACC         | Macrophages M2               | -0.078726053 | 0.620193402 |
| ACC         | Dendritic cells resting      | 0.142871944  | 0.366729822 |
| ACC         | Dendritic cells activated    | -0.23399483  | 0.135833077 |
| ACC         | Mast cells resting           | -0.228904862 | 0.144800766 |
| ACC         | Mast cells activated         | 0.312892451  | 0.043637764 |
| ACC         | Eosinophils                  | -0.074835573 | 0.637629984 |
| ACC         | Neutrophils                  | 0.454727842  | 0.002482839 |
| BLCA        | B cells naive                | 0.000571949  | 0.991542291 |
| BLCA        | B cells memory               | 0.100569618  | 0.061668231 |
| BLCA        | Plasma cells                 | 0.031285652  | 0.561926184 |
| BLCA        | T cells CD8                  | -0.07180991  | 0.182653638 |
| BLCA        | T cells CD4 naive            | 0.030548613  | 0.571181068 |
| BLCA        | T cells CD4 memory resting   | -0.062600668 | 0.245493365 |
| BLCA        | T cells CD4 memory activated | -0.124750178 | 0.020277962 |
| BLCA        | T cells follicular helper    | -0.05482526  | 0.309208917 |
| BLCA        | T cells regulatory (Tregs)   | 0.036902092  | 0.493869285 |
| BLCA        | T cells gamma delta          | 0.037331591  | 0.488851826 |
| BLCA        | NK cells resting             | 0.105428619  | 0.050059756 |
| BLCA        | NK cells activated           | -0.102808993 | 0.056068516 |
| BLCA        | Monocytes                    | 0.039385418  | 0.465241425 |
| BLCA        | Macrophages M0               | 0.124187828  | 0.020853893 |
| BLCA        | Macrophages M1               | -0.06345665  | 0.239084835 |
| BLCA        | Macrophages M2               | 0.188377938  | 0.000426782 |
| BLCA        | Dendritic cells resting      | -0.153889815 | 0.004114232 |
| BLCA        | Dendritic cells activated    | 0.045529685  | 0.398516147 |
| BLCA        | Mast cells resting           | 0.046319248  | 0.390378552 |
| BLCA        | Mast cells activated         | -0.023616676 | 0.661555241 |
| BLCA        | Eosinophils                  | -0.005733761 | 0.915368899 |
| BLCA        | Neutrophils                  | -0.123021579 | 0.022093703 |
| BRCA        | B cells naive                | 0.047232967  | 0.118610569 |
| BRCA        | B cells memory               | 0.037905072  | 0.210504784 |
| BRCA        | Plasma cells                 | -0.02358516  | 0.436006514 |
| BRCA        | T cells CD8                  | 0.079249409  | 0.008763253 |
| BRCA        | T cells CD4 naive            | 0            | NA          |
| BRCA        | T cells CD4 memory resting   | -0.110907862 | 0.000238952 |
| BRCA        | T cells CD4 memory activated | 0.087356498  | 0.003849037 |
| BRCA        | T cells follicular helper    | 0.128098119  | 2.16E-05    |

|       |                              |              |             |
|-------|------------------------------|--------------|-------------|
| BRCA  | T cells regulatory (Tregs)   | -0.005349857 | 0.859769106 |
| BRCA  | T cells gamma delta          | -0.009576468 | 0.751814058 |
| BRCA  | NK cells resting             | -0.002420297 | 0.936296982 |
| BRCA  | NK cells activated           | 0.082533857  | 0.006330522 |
| BRCA  | Monocytes                    | -0.027192529 | 0.369112304 |
| BRCA  | Macrophages M0               | 0.048714098  | 0.107479143 |
| BRCA  | Macrophages M1               | 0.106581916  | 0.000416058 |
| BRCA  | Macrophages M2               | -0.047867841 | 0.113733364 |
| BRCA  | Dendritic cells resting      | -0.04991577  | 0.099069241 |
| BRCA  | Dendritic cells activated    | 0.097581732  | 0.001237357 |
| BRCA  | Mast cells resting           | -0.178234271 | 2.97E-09    |
| BRCA  | Mast cells activated         | 0.026800159  | 0.376063242 |
| BRCA  | Eosinophils                  | -0.032248974 | 0.286773695 |
| BRCA  | Neutrophils                  | -0.044599086 | 0.140611844 |
| CECSC | B cells naive                | -0.046848957 | 0.42273732  |
| CECSC | B cells memory               | 0.053445972  | 0.360337916 |
| CECSC | Plasma cells                 | -0.072344303 | 0.215381496 |
| CECSC | T cells CD8                  | 0.018467492  | 0.752101274 |
| CECSC | T cells CD4 naive            | 0            | NA          |
| CECSC | T cells CD4 memory resting   | 0.036266864  | 0.534952731 |
| CECSC | T cells CD4 memory activated | 0.051811241  | 0.375237793 |
| CECSC | T cells follicular helper    | -0.059915742 | 0.305061631 |
| CECSC | T cells regulatory (Tregs)   | 0.029131689  | 0.618248166 |
| CECSC | T cells gamma delta          | -0.00901058  | 0.877524684 |
| CECSC | NK cells resting             | 0.061417477  | 0.293077623 |
| CECSC | NK cells activated           | -0.056928156 | 0.3298518   |
| CECSC | Monocytes                    | -0.051206448 | 0.380844837 |
| CECSC | Macrophages M0               | 0.03529777   | 0.545927812 |
| CECSC | Macrophages M1               | 0.093709212  | 0.108227435 |
| CECSC | Macrophages M2               | 0.062061731  | 0.288034088 |
| CECSC | Dendritic cells resting      | 0.011493897  | 0.844154246 |
| CECSC | Dendritic cells activated    | -0.051192874 | 0.380971273 |
| CECSC | Mast cells resting           | -0.000119958 | 0.998363059 |
| CECSC | Mast cells activated         | -0.078506264 | 0.17870889  |
| CECSC | Eosinophils                  | 0.029637655  | 0.612159274 |
| CECSC | Neutrophils                  | -0.109679692 | 0.059904922 |
| CHOL  | B cells naive                | -0.050203678 | 0.784954774 |
| CHOL  | B cells memory               | 0.322229127  | 0.072082083 |
| CHOL  | Plasma cells                 | -0.233637181 | 0.198105844 |
| CHOL  | T cells CD8                  | 0.150746181  | 0.410199043 |
| CHOL  | T cells CD4 naive            | 0            | NA          |
| CHOL  | T cells CD4 memory resting   | -0.036001992 | 0.844908786 |
| CHOL  | T cells CD4 memory activated | -0.033975501 | 0.853542086 |
| CHOL  | T cells follicular helper    | 0.076881811  | 0.675781948 |
| CHOL  | T cells regulatory (Tregs)   | 0.023944868  | 0.896501583 |
| CHOL  | T cells gamma delta          | 0.059394556  | 0.746767916 |
| CHOL  | NK cells resting             | -0.335644855 | 0.060374578 |
| CHOL  | NK cells activated           | 0.523767814  | 0.002094052 |
| CHOL  | Monocytes                    | 0.140645363  | 0.442615225 |
| CHOL  | Macrophages M0               | -0.365998287 | 0.039386839 |
| CHOL  | Macrophages M1               | 0.112847778  | 0.538597704 |
| CHOL  | Macrophages M2               | -0.092764133 | 0.613582359 |
| CHOL  | Dendritic cells resting      | -0.064163342 | 0.727178135 |
| CHOL  | Dendritic cells activated    | -0.02310559  | 0.900110876 |
| CHOL  | Mast cells resting           | 0.306620849  | 0.087842288 |

|      |                              |              |             |
|------|------------------------------|--------------|-------------|
| CHOL | Mast cells activated         | -0.217431191 | 0.231927937 |
| CHOL | Eosinophils                  | -0.047553472 | 0.796062244 |
| CHOL | Neutrophils                  | -0.317664207 | 0.076444524 |
| COAD | B cells naive                | 0.096818514  | 0.039856212 |
| COAD | B cells memory               | 0.034398314  | 0.466186931 |
| COAD | Plasma cells                 | -0.034226232 | 0.468421593 |
| COAD | T cells CD8                  | 0.024836816  | 0.598838947 |
| COAD | T cells CD4 naive            | 0            | NA          |
| COAD | T cells CD4 memory resting   | 0.043250592  | 0.359466397 |
| COAD | T cells CD4 memory activated | 0.048472416  | 0.304352561 |
| COAD | T cells follicular helper    | 0.009350766  | 0.843019074 |
| COAD | T cells regulatory (Tregs)   | 0.055671243  | 0.238035584 |
| COAD | T cells gamma delta          | -0.048559651 | 0.303482056 |
| COAD | NK cells resting             | -0.090893211 | 0.053741429 |
| COAD | NK cells activated           | -0.081504836 | 0.083813981 |
| COAD | Monocytes                    | -0.028931566 | 0.539984818 |
| COAD | Macrophages M0               | 0.122642524  | 0.009129915 |
| COAD | Macrophages M1               | -0.019040941 | 0.686740571 |
| COAD | Macrophages M2               | -0.068909743 | 0.143989168 |
| COAD | Dendritic cells resting      | -0.000290594 | 0.995089735 |
| COAD | Dendritic cells activated    | -0.119663831 | 0.01097906  |
| COAD | Mast cells resting           | 0.104624111  | 0.026296021 |
| COAD | Mast cells activated         | -0.168149411 | 0.000335007 |
| COAD | Eosinophils                  | -0.119534007 | 0.011066709 |
| COAD | Neutrophils                  | -0.208851875 | 7.73E-06    |
| DLBC | B cells naive                | 0.095659659  | 0.517783764 |
| DLBC | B cells memory               | 0.073291382  | 0.620558189 |
| DLBC | Plasma cells                 | -0.068833671 | 0.642021022 |
| DLBC | T cells CD8                  | -0.171734792 | 0.243151343 |
| DLBC | T cells CD4 naive            | 0            | NA          |
| DLBC | T cells CD4 memory resting   | 0.148793923  | 0.312814701 |
| DLBC | T cells CD4 memory activated | -0.306080386 | 0.034365165 |
| DLBC | T cells follicular helper    | 0.017528925  | 0.905868199 |
| DLBC | T cells regulatory (Tregs)   | 0.463528154  | 0.000906634 |
| DLBC | T cells gamma delta          | -0.050856487 | 0.731388842 |
| DLBC | NK cells resting             | -0.081227842 | 0.583117319 |
| DLBC | NK cells activated           | -0.065341625 | 0.659039924 |
| DLBC | Monocytes                    | 0.182344166  | 0.214809865 |
| DLBC | Macrophages M0               | 0.070295347  | 0.634950361 |
| DLBC | Macrophages M1               | -0.094266588 | 0.523926732 |
| DLBC | Macrophages M2               | -0.20620978  | 0.159673993 |
| DLBC | Dendritic cells resting      | 0.068362     | 0.64430942  |
| DLBC | Dendritic cells activated    | -0.111508396 | 0.450521223 |
| DLBC | Mast cells resting           | 0.073850376  | 0.617888196 |
| DLBC | Mast cells activated         | 0            | NA          |
| DLBC | Eosinophils                  | -0.343015936 | 0.016997972 |
| DLBC | Neutrophils                  | -0.128525401 | 0.383974354 |
| ESCA | B cells naive                | 0.133975261  | 0.10450669  |
| ESCA | B cells memory               | -0.185075268 | 0.024326173 |
| ESCA | Plasma cells                 | 0.068721211  | 0.406582494 |
| ESCA | T cells CD8                  | -0.096343492 | 0.244082492 |
| ESCA | T cells CD4 naive            | 0            | NA          |
| ESCA | T cells CD4 memory resting   | 0.072826717  | 0.379058757 |
| ESCA | T cells CD4 memory activated | -0.099219819 | 0.230221062 |
| ESCA | T cells follicular helper    | 0.121561183  | 0.141080206 |

|      |                              |              |             |
|------|------------------------------|--------------|-------------|
| ESCA | T cells regulatory (Tregs)   | -0.023651447 | 0.775389397 |
| ESCA | T cells gamma delta          | -0.068917499 | 0.405240282 |
| ESCA | NK cells resting             | -0.06360352  | 0.44249461  |
| ESCA | NK cells activated           | -0.04870545  | 0.556631363 |
| ESCA | Monocytes                    | 0.087999013  | 0.287536317 |
| ESCA | Macrophages M0               | 0.12747811   | 0.122589559 |
| ESCA | Macrophages M1               | 0.009546826  | 0.908318299 |
| ESCA | Macrophages M2               | -0.062435234 | 0.450937467 |
| ESCA | Dendritic cells resting      | 0.069524957  | 0.401103144 |
| ESCA | Dendritic cells activated    | -0.132406795 | 0.108667404 |
| ESCA | Mast cells resting           | 0.01813553   | 0.826824899 |
| ESCA | Mast cells activated         | -0.245130063 | 0.002675061 |
| ESCA | Eosinophils                  | -0.040918274 | 0.621462682 |
| ESCA | Neutrophils                  | -0.154459368 | 0.060873709 |
| GBM  | B cells naive                | -0.041702466 | 0.602885148 |
| GBM  | B cells memory               | 0.121413649  | 0.128597599 |
| GBM  | Plasma cells                 | -0.086594179 | 0.279313531 |
| GBM  | T cells CD8                  | 0.053504196  | 0.504340683 |
| GBM  | T cells CD4 naive            | -0.005366248 | 0.946647327 |
| GBM  | T cells CD4 memory resting   | -0.171563199 | 0.031130561 |
| GBM  | T cells CD4 memory activated | -0.058294905 | 0.466885243 |
| GBM  | T cells follicular helper    | -0.008580644 | 0.914786944 |
| GBM  | T cells regulatory (Tregs)   | 0.039334777  | 0.623642529 |
| GBM  | T cells gamma delta          | -0.175726562 | 0.027207723 |
| GBM  | NK cells resting             | -0.03537805  | 0.658994123 |
| GBM  | NK cells activated           | -0.173897845 | 0.028875451 |
| GBM  | Monocytes                    | 0.196987155  | 0.013109292 |
| GBM  | Macrophages M0               | 0.045847933  | 0.567305375 |
| GBM  | Macrophages M1               | -0.010726687 | 0.89358793  |
| GBM  | Macrophages M2               | 0.030336391  | 0.705146986 |
| GBM  | Dendritic cells resting      | 0.041575252  | 0.603992564 |
| GBM  | Dendritic cells activated    | -0.147194248 | 0.064953556 |
| GBM  | Mast cells resting           | -0.096480924 | 0.227843599 |
| GBM  | Mast cells activated         | -0.008659717 | 0.914004682 |
| GBM  | Eosinophils                  | 0.067838119  | 0.397041224 |
| GBM  | Neutrophils                  | -0.117442835 | 0.141669456 |
| HNSC | B cells naive                | 0.07788843   | 0.081566047 |
| HNSC | B cells memory               | 0.024173367  | 0.589334601 |
| HNSC | Plasma cells                 | 0.068033989  | 0.128318717 |
| HNSC | T cells CD8                  | 0.156453448  | 0.000440048 |
| HNSC | T cells CD4 naive            | 0.036491884  | 0.415055064 |
| HNSC | T cells CD4 memory resting   | -0.171933004 | 0.000109909 |
| HNSC | T cells CD4 memory activated | 0.029785602  | 0.505939032 |
| HNSC | T cells follicular helper    | 0.195759432  | 1.02E-05    |
| HNSC | T cells regulatory (Tregs)   | 0.103536268  | 0.02045481  |
| HNSC | T cells gamma delta          | 0.002290043  | 0.95922182  |
| HNSC | NK cells resting             | -0.022693671 | 0.612330556 |
| HNSC | NK cells activated           | -0.08629453  | 0.053568398 |
| HNSC | Monocytes                    | -0.045262232 | 0.311971686 |
| HNSC | Macrophages M0               | -0.010632102 | 0.812353537 |
| HNSC | Macrophages M1               | -0.063785543 | 0.153984003 |
| HNSC | Macrophages M2               | 0.039945412  | 0.372273895 |
| HNSC | Dendritic cells resting      | 0.016797476  | 0.707611592 |
| HNSC | Dendritic cells activated    | -0.042842771 | 0.338569727 |
| HNSC | Mast cells resting           | -0.050993611 | 0.254585657 |

|      |                              |              |             |
|------|------------------------------|--------------|-------------|
| HNSC | Mast cells activated         | -0.066823152 | 0.135270175 |
| HNSC | Eosinophils                  | -0.090110248 | 0.043799445 |
| HNSC | Neutrophils                  | -0.166500129 | 0.00018138  |
| KICH | B cells naive                | -0.090335326 | 0.600308616 |
| KICH | B cells memory               | 0.038176902  | 0.82504737  |
| KICH | Plasma cells                 | 0.153544238  | 0.371284176 |
| KICH | T cells CD8                  | 0.452104671  | 0.00563635  |
| KICH | T cells CD4 naive            | 0            | NA          |
| KICH | T cells CD4 memory resting   | -0.110056632 | 0.522835368 |
| KICH | T cells CD4 memory activated | 0.285312706  | 0.091656331 |
| KICH | T cells follicular helper    | -0.14809683  | 0.38869361  |
| KICH | T cells regulatory (Tregs)   | -0.162885622 | 0.342527943 |
| KICH | T cells gamma delta          | -0.121949441 | 0.478619271 |
| KICH | NK cells resting             | -0.17677671  | 0.302363278 |
| KICH | NK cells activated           | -0.267405339 | 0.114870432 |
| KICH | Monocytes                    | 0.669060043  | 8.16E-06    |
| KICH | Macrophages M0               | -0.301478142 | 0.073959301 |
| KICH | Macrophages M1               | -0.055866527 | 0.746224025 |
| KICH | Macrophages M2               | -0.176326241 | 0.303616736 |
| KICH | Dendritic cells resting      | -0.157460051 | 0.359060126 |
| KICH | Dendritic cells activated    | -0.253408283 | 0.135894922 |
| KICH | Mast cells resting           | 0.046513486  | 0.787639273 |
| KICH | Mast cells activated         | 0.237812986  | 0.162518401 |
| KICH | Eosinophils                  | 0.086582231  | 0.615594227 |
| KICH | Neutrophils                  | 0.11442498   | 0.506365088 |
| KIRC | B cells naive                | -0.082366144 | 0.05857643  |
| KIRC | B cells memory               | 0.038935742  | 0.371914235 |
| KIRC | Plasma cells                 | -0.047865826 | 0.272250074 |
| KIRC | T cells CD8                  | 0.137893108  | 0.001492085 |
| KIRC | T cells CD4 naive            | 0            | NA          |
| KIRC | T cells CD4 memory resting   | 0.005599695  | 0.897858345 |
| KIRC | T cells CD4 memory activated | -0.01851403  | 0.671239003 |
| KIRC | T cells follicular helper    | 0.096855461  | 0.026045744 |
| KIRC | T cells regulatory (Tregs)   | -0.003265914 | 0.940320259 |
| KIRC | T cells gamma delta          | -0.015056746 | 0.729961091 |
| KIRC | NK cells resting             | 0.047006245  | 0.280963503 |
| KIRC | NK cells activated           | 0.081564064  | 0.061085078 |
| KIRC | Monocytes                    | 0.023360677  | 0.592243047 |
| KIRC | Macrophages M0               | -0.142430483 | 0.001031493 |
| KIRC | Macrophages M1               | 0.069135328  | 0.112570894 |
| KIRC | Macrophages M2               | -0.061293951 | 0.159601701 |
| KIRC | Dendritic cells resting      | -0.042839468 | 0.325856471 |
| KIRC | Dendritic cells activated    | -0.091880398 | 0.034796942 |
| KIRC | Mast cells resting           | 0.017190816  | 0.693501447 |
| KIRC | Mast cells activated         | 0.022595201  | 0.604434664 |
| KIRC | Eosinophils                  | -0.031060257 | 0.47634668  |
| KIRC | Neutrophils                  | -0.094701429 | 0.029569634 |
| KIRP | B cells naive                | -0.222166045 | 0.00029771  |
| KIRP | B cells memory               | 0.158990095  | 0.010093219 |
| KIRP | Plasma cells                 | -0.047920204 | 0.440765225 |
| KIRP | T cells CD8                  | -0.150140785 | 0.015193515 |
| KIRP | T cells CD4 naive            | 0            | NA          |
| KIRP | T cells CD4 memory resting   | 0.297469859  | 9.88E-07    |
| KIRP | T cells CD4 memory activated | -0.120918773 | 0.051022366 |
| KIRP | T cells follicular helper    | -0.026542838 | 0.669503417 |

|      |                              |              |             |
|------|------------------------------|--------------|-------------|
| KIRP | T cells regulatory (Tregs)   | -0.077243004 | 0.213584871 |
| KIRP | T cells gamma delta          | -0.119884893 | 0.053053431 |
| KIRP | NK cells resting             | 0.030405543  | 0.6248616   |
| KIRP | NK cells activated           | 0.027433076  | 0.659103924 |
| KIRP | Monocytes                    | 0.083104325  | 0.180745361 |
| KIRP | Macrophages M0               | -0.259716929 | 2.15E-05    |
| KIRP | Macrophages M1               | -0.186090488 | 0.002541449 |
| KIRP | Macrophages M2               | -0.084171694 | 0.175189758 |
| KIRP | Dendritic cells resting      | 0.053275333  | 0.391352558 |
| KIRP | Dendritic cells activated    | 0.101817108  | 0.100739644 |
| KIRP | Mast cells resting           | 0.339720921  | 1.80E-08    |
| KIRP | Mast cells activated         | 0.130953347  | 0.034466127 |
| KIRP | Eosinophils                  | -0.13795837  | 0.025830182 |
| KIRP | Neutrophils                  | -0.008257203 | 0.894382274 |
| LAML | B cells naive                | -0.201832526 | 0.012948562 |
| LAML | B cells memory               | 0.029703396  | 0.71731598  |
| LAML | Plasma cells                 | -0.141532613 | 0.083012768 |
| LAML | T cells CD8                  | -0.201971466 | 0.012885155 |
| LAML | T cells CD4 naive            | 0.034748507  | 0.671874707 |
| LAML | T cells CD4 memory resting   | 0.12083953   | 0.13941225  |
| LAML | T cells CD4 memory activated | -0.032340665 | 0.693426376 |
| LAML | T cells follicular helper    | 0.18693343   | 0.021545528 |
| LAML | T cells regulatory (Tregs)   | -0.116570774 | 0.154039696 |
| LAML | T cells gamma delta          | 5.29E-06     | 0.9999486   |
| LAML | NK cells resting             | -0.140354845 | 0.085633247 |
| LAML | NK cells activated           | -0.07459607  | 0.362662355 |
| LAML | Monocytes                    | 0.214200791  | 0.008266246 |
| LAML | Macrophages M0               | 0.121982992  | 0.135679788 |
| LAML | Macrophages M1               | -0.016489602 | 0.840731823 |
| LAML | Macrophages M2               | 0.125422338  | 0.12491306  |
| LAML | Dendritic cells resting      | -0.059767055 | 0.46601458  |
| LAML | Dendritic cells activated    | 0.041113442  | 0.616213325 |
| LAML | Mast cells resting           | -0.20731283  | 0.010644911 |
| LAML | Mast cells activated         | -0.082531326 | 0.313716522 |
| LAML | Eosinophils                  | 0.056555682  | 0.490354486 |
| LAML | Neutrophils                  | 0.293396111  | 0.000256031 |
| LGG  | B cells naive                | -0.086254806 | 0.103239412 |
| LGG  | B cells memory               | 0.033108269  | 0.532352939 |
| LGG  | Plasma cells                 | -0.029042928 | 0.583889844 |
| LGG  | T cells CD8                  | -0.049904174 | 0.346440577 |
| LGG  | T cells CD4 naive            | 0.097039123  | 0.06665762  |
| LGG  | T cells CD4 memory resting   | -0.287190524 | 3.17E-08    |
| LGG  | T cells CD4 memory activated | -0.074580825 | 0.159083063 |
| LGG  | T cells follicular helper    | -0.014236364 | 0.788363561 |
| LGG  | T cells regulatory (Tregs)   | -0.105072636 | 0.046964851 |
| LGG  | T cells gamma delta          | -0.038203481 | 0.471168627 |
| LGG  | NK cells resting             | 0.123194811  | 0.019716908 |
| LGG  | NK cells activated           | 0.109584667  | 0.038225066 |
| LGG  | Monocytes                    | 0.086261804  | 0.103211342 |
| LGG  | Macrophages M0               | -0.08415349  | 0.111945098 |
| LGG  | Macrophages M1               | -0.170489778 | 0.001202543 |
| LGG  | Macrophages M2               | 0.143326127  | 0.006599378 |
| LGG  | Dendritic cells resting      | 0.058770476  | 0.267404499 |
| LGG  | Dendritic cells activated    | -0.123295035 | 0.0196165   |
| LGG  | Mast cells resting           | -0.062545134 | 0.237830506 |

|      |                              |              |             |
|------|------------------------------|--------------|-------------|
| LGG  | Mast cells activated         | 0.090172892  | 0.088445261 |
| LGG  | Eosinophils                  | 0.009540839  | 0.857235854 |
| LGG  | Neutrophils                  | -0.057344869 | 0.279202784 |
| LIHC | B cells naive                | -0.010695002 | 0.8546172   |
| LIHC | B cells memory               | 0.122919825  | 0.034526627 |
| LIHC | Plasma cells                 | 0.077838656  | 0.181697176 |
| LIHC | T cells CD8                  | -0.123612181 | 0.033514465 |
| LIHC | T cells CD4 naive            | 0.01691316   | 0.771988735 |
| LIHC | T cells CD4 memory resting   | 0.009089166  | 0.876255713 |
| LIHC | T cells CD4 memory activated | 0.008618059  | 0.882622097 |
| LIHC | T cells follicular helper    | 0.098262403  | 0.091506622 |
| LIHC | T cells regulatory (Tregs)   | 0.034486702  | 0.554522439 |
| LIHC | T cells gamma delta          | -0.04953648  | 0.395784916 |
| LIHC | NK cells resting             | -0.043635025 | 0.454517352 |
| LIHC | NK cells activated           | -0.105929287 | 0.06877597  |
| LIHC | Monocytes                    | 0.118868244  | 0.040984716 |
| LIHC | Macrophages M0               | 0.218535997  | 0.000150747 |
| LIHC | Macrophages M1               | -0.053896263 | 0.35547866  |
| LIHC | Macrophages M2               | -0.132643416 | 0.022458519 |
| LIHC | Dendritic cells resting      | 0.041497058  | 0.476942979 |
| LIHC | Dendritic cells activated    | 0.223034412  | 0.000108902 |
| LIHC | Mast cells resting           | -0.088793751 | 0.127455331 |
| LIHC | Mast cells activated         | -0.073108457 | 0.209783004 |
| LIHC | Eosinophils                  | -0.007493871 | 0.897843747 |
| LIHC | Neutrophils                  | 0.031262734  | 0.592152376 |
| LUAD | B cells naive                | 0.14425192   | 0.000828402 |
| LUAD | B cells memory               | -0.022632095 | 0.601786132 |
| LUAD | Plasma cells                 | 0.14131363   | 0.001059125 |
| LUAD | T cells CD8                  | 0.082701602  | 0.056146169 |
| LUAD | T cells CD4 naive            | 0            | NA          |
| LUAD | T cells CD4 memory resting   | -0.039803327 | 0.358618229 |
| LUAD | T cells CD4 memory activated | -0.063977739 | 0.139816644 |
| LUAD | T cells follicular helper    | 0.177342429  | 3.77E-05    |
| LUAD | T cells regulatory (Tregs)   | 0.09212746   | 0.033298854 |
| LUAD | T cells gamma delta          | -0.082781683 | 0.055907609 |
| LUAD | NK cells resting             | 0.027328364  | 0.528594027 |
| LUAD | NK cells activated           | 0.000310817  | 0.994282669 |
| LUAD | Monocytes                    | -0.116460464 | 0.007058195 |
| LUAD | Macrophages M0               | 0.082713328  | 0.056111186 |
| LUAD | Macrophages M1               | 0.043545367  | 0.315193588 |
| LUAD | Macrophages M2               | -0.123105048 | 0.004386474 |
| LUAD | Dendritic cells resting      | -0.14010731  | 0.00116998  |
| LUAD | Dendritic cells activated    | 0.019825021  | 0.647601559 |
| LUAD | Mast cells resting           | -0.098684696 | 0.022567691 |
| LUAD | Mast cells activated         | -0.012857786 | 0.766894563 |
| LUAD | Eosinophils                  | -0.127532865 | 0.003154744 |
| LUAD | Neutrophils                  | -0.211229369 | 8.42E-07    |
| LUSC | B cells naive                | 0.126866118  | 0.004575629 |
| LUSC | B cells memory               | 0.002735303  | 0.951448806 |
| LUSC | Plasma cells                 | -0.135570629 | 0.002431097 |
| LUSC | T cells CD8                  | 0.14447447   | 0.001225169 |
| LUSC | T cells CD4 naive            | -0.044165016 | 0.325319129 |
| LUSC | T cells CD4 memory resting   | -0.138359253 | 0.001969781 |
| LUSC | T cells CD4 memory activated | -0.005799245 | 0.897285385 |
| LUSC | T cells follicular helper    | 0.113284344  | 0.011411477 |

|      |                              |              |             |
|------|------------------------------|--------------|-------------|
| LUSC | T cells regulatory (Tregs)   | 0.088364894  | 0.048741646 |
| LUSC | T cells gamma delta          | -0.046620865 | 0.299112996 |
| LUSC | NK cells resting             | -0.011126957 | 0.804372802 |
| LUSC | NK cells activated           | 0.082355905  | 0.066306009 |
| LUSC | Monocytes                    | 0.008638626  | 0.847508796 |
| LUSC | Macrophages M0               | 0.081776587  | 0.068244609 |
| LUSC | Macrophages M1               | 0.100065337  | 0.025545967 |
| LUSC | Macrophages M2               | -0.173376764 | 0.00010073  |
| LUSC | Dendritic cells resting      | -0.042463969 | 0.344318177 |
| LUSC | Dendritic cells activated    | 0.052985777  | 0.237887329 |
| LUSC | Mast cells resting           | 0.048931716  | 0.27577268  |
| LUSC | Mast cells activated         | -0.055432863 | 0.216876645 |
| LUSC | Eosinophils                  | -0.023660638 | 0.598363294 |
| LUSC | Neutrophils                  | -0.188656933 | 2.26E-05    |
| MESO | B cells naive                | 0.036939472  | 0.740233595 |
| MESO | B cells memory               | -0.041874785 | 0.707008543 |
| MESO | Plasma cells                 | 0.257992421  | 0.018533144 |
| MESO | T cells CD8                  | 0.184596791  | 0.094792291 |
| MESO | T cells CD4 naive            | 0            | NA          |
| MESO | T cells CD4 memory resting   | -0.218377353 | 0.047328594 |
| MESO | T cells CD4 memory activated | -0.178638607 | 0.106133345 |
| MESO | T cells follicular helper    | 0.395044516  | 0.000219045 |
| MESO | T cells regulatory (Tregs)   | -0.104327309 | 0.347927334 |
| MESO | T cells gamma delta          | -0.020921812 | 0.851083118 |
| MESO | NK cells resting             | -0.117099376 | 0.291755118 |
| MESO | NK cells activated           | 0.201940796  | 0.067133713 |
| MESO | Monocytes                    | -0.013325551 | 0.904827192 |
| MESO | Macrophages M0               | 0.048283198  | 0.664678623 |
| MESO | Macrophages M1               | 0.003881606  | 0.972217743 |
| MESO | Macrophages M2               | -0.261520338 | 0.01693334  |
| MESO | Dendritic cells resting      | 0.14686013   | 0.185216047 |
| MESO | Dendritic cells activated    | -0.016246072 | 0.884100037 |
| MESO | Mast cells resting           | -0.161515867 | 0.144631059 |
| MESO | Mast cells activated         | -0.021475472 | 0.847189315 |
| MESO | Eosinophils                  | -0.110135047 | 0.321597491 |
| MESO | Neutrophils                  | -0.126213145 | 0.255550108 |
| MESO | B cells naive                | 0.129416069  | 0.023338482 |
| MESO | B cells memory               | -0.102538741 | 0.072808953 |
| MESO | Plasma cells                 | 0.045768384  | 0.424247273 |
| MESO | T cells CD8                  | -0.021051011 | 0.713335893 |
| MESO | T cells CD4 naive            | 0            | NA          |
| MESO | T cells CD4 memory resting   | -0.011013471 | 0.847593188 |
| MESO | T cells CD4 memory activated | 0.0651185    | 0.25532028  |
| MESO | T cells follicular helper    | 0.097187282  | 0.089142473 |
| MESO | T cells regulatory (Tregs)   | 0.018781878  | 0.743084388 |
| MESO | T cells gamma delta          | 0.017316051  | 0.762509731 |
| MESO | NK cells resting             | -0.073285781 | 0.200349992 |
| MESO | NK cells activated           | 0.015400796  | 0.78811521  |
| MESO | Monocytes                    | -0.127251298 | 0.025774081 |
| MESO | Macrophages M0               | 0.106346879  | 0.062740296 |
| MESO | Macrophages M1               | 0.133864293  | 0.018950953 |
| MESO | Macrophages M2               | -0.089613657 | 0.117136428 |
| MESO | Dendritic cells resting      | -0.135994752 | 0.017116902 |
| MESO | Dendritic cells activated    | 0.007869002  | 0.890781227 |
| MESO | Mast cells resting           | 0.077579433  | 0.17516262  |

|      |                              |              |             |
|------|------------------------------|--------------|-------------|
| OV   | Mast cells activated         | -0.025374823 | 0.657866671 |
| OV   | Eosinophils                  | -0.038170158 | 0.505213083 |
| OV   | Neutrophils                  | -0.071348539 | 0.212537951 |
| PAAD | B cells naive                | 0.169538709  | 0.026635492 |
| PAAD | B cells memory               | -0.093144332 | 0.225618594 |
| PAAD | Plasma cells                 | 0.097942276  | 0.202509683 |
| PAAD | T cells CD8                  | 0.204668654  | 0.007247649 |
| PAAD | T cells CD4 naive            | 0            | NA          |
| PAAD | T cells CD4 memory resting   | -0.143622249 | 0.060922551 |
| PAAD | T cells CD4 memory activated | 0.083535428  | 0.27736613  |
| PAAD | T cells follicular helper    | 0.096183856  | 0.210771993 |
| PAAD | T cells regulatory (Tregs)   | -0.092483213 | 0.228943494 |
| PAAD | T cells gamma delta          | -0.008404555 | 0.913123462 |
| PAAD | NK cells resting             | -0.088930436 | 0.247403081 |
| PAAD | NK cells activated           | -0.063382563 | 0.410176048 |
| PAAD | Monocytes                    | 0.136861914  | 0.074263931 |
| PAAD | Macrophages M0               | -0.182816349 | 0.016697351 |
| PAAD | Macrophages M1               | 0.046880522  | 0.542603425 |
| PAAD | Macrophages M2               | -0.101082564 | 0.18834092  |
| PAAD | Dendritic cells resting      | 0.048172255  | 0.531526811 |
| PAAD | Dendritic cells activated    | -0.102090334 | 0.1839513   |
| PAAD | Mast cells resting           | -0.042012832 | 0.585340593 |
| PAAD | Mast cells activated         | 0.017297029  | 0.822332637 |
| PAAD | Eosinophils                  | -0.020146733 | 0.79367076  |
| PAAD | Neutrophils                  | -0.114810438 | 0.134841786 |
| PCPG | B cells naive                | -0.107503404 | 0.368737639 |
| PCPG | B cells memory               | 0.035923541  | 0.764495069 |
| PCPG | Plasma cells                 | 0.00828136   | 0.944956978 |
| PCPG | T cells CD8                  | 0.127658439  | 0.285232154 |
| PCPG | T cells CD4 naive            | 0            | NA          |
| PCPG | T cells CD4 memory resting   | -0.169240734 | 0.1552595   |
| PCPG | T cells CD4 memory activated | -9.52E-05    | 0.999366629 |
| PCPG | T cells follicular helper    | 0.065726086  | 0.583322966 |
| PCPG | T cells regulatory (Tregs)   | 0.023153822  | 0.846916613 |
| PCPG | T cells gamma delta          | 0.016213537  | 0.892471548 |
| PCPG | NK cells resting             | -0.069062389 | 0.564313316 |
| PCPG | NK cells activated           | -0.01657088  | 0.8901162   |
| PCPG | Monocytes                    | -0.258115597 | 0.028590145 |
| PCPG | Macrophages M0               | 0.276503131  | 0.018713793 |
| PCPG | Macrophages M1               | 0.073845147  | 0.537582344 |
| PCPG | Macrophages M2               | -0.008989547 | 0.940258204 |
| PCPG | Dendritic cells resting      | -0.176600347 | 0.137817261 |
| PCPG | Dendritic cells activated    | -0.023161726 | 0.846864985 |
| PCPG | Mast cells resting           | 0.325744295  | 0.005234268 |
| PCPG | Mast cells activated         | -0.145454828 | 0.22279854  |
| PCPG | Eosinophils                  | 0.103679154  | 0.386112493 |
| PCPG | Neutrophils                  | -0.091909169 | 0.44257423  |
| PRAD | B cells naive                | 0.048082148  | 0.363680156 |
| PRAD | B cells memory               | 0.085408099  | 0.106189042 |
| PRAD | Plasma cells                 | -0.022492986 | 0.671019878 |
| PRAD | T cells CD8                  | 0.102776403  | 0.051690933 |
| PRAD | T cells CD4 naive            | 0            | NA          |
| PRAD | T cells CD4 memory resting   | -0.129434929 | 0.01411901  |
| PRAD | T cells CD4 memory activated | -0.005376871 | 0.91913561  |
| PRAD | T cells follicular helper    | 0.0323643    | 0.541042347 |

|      |                              |              |             |
|------|------------------------------|--------------|-------------|
| PRAD | T cells regulatory (Tregs)   | 0.211798544  | 5.23E-05    |
| PRAD | T cells gamma delta          | 0.093740645  | 0.076088755 |
| PRAD | NK cells resting             | -0.091798805 | 0.082397347 |
| PRAD | NK cells activated           | 0.109965546  | 0.037287418 |
| PRAD | Monocytes                    | -0.141581171 | 0.007214623 |
| PRAD | Macrophages M0               | 0.077155461  | 0.144574857 |
| PRAD | Macrophages M1               | -0.029410777 | 0.578599595 |
| PRAD | Macrophages M2               | 0.072822121  | 0.168574451 |
| PRAD | Dendritic cells resting      | -0.132971074 | 0.01167349  |
| PRAD | Dendritic cells activated    | -0.052056923 | 0.325329404 |
| PRAD | Mast cells resting           | -0.042496456 | 0.422120686 |
| PRAD | Mast cells activated         | -0.06761629  | 0.201199702 |
| PRAD | Eosinophils                  | 0.002957112  | 0.95547405  |
| PRAD | Neutrophils                  | -0.144613919 | 0.006052381 |
| READ | B cells naive                | 0.014529343  | 0.858523796 |
| READ | B cells memory               | 0.093581255  | 0.249909056 |
| READ | Plasma cells                 | -0.032967489 | 0.685807474 |
| READ | T cells CD8                  | 0.051882101  | 0.524181862 |
| READ | T cells CD4 naive            | 0            | NA          |
| READ | T cells CD4 memory resting   | 0.041086765  | 0.614078366 |
| READ | T cells CD4 memory activated | -0.045239077 | 0.578708689 |
| READ | T cells follicular helper    | 0.121264535  | 0.135391483 |
| READ | T cells regulatory (Tregs)   | -0.159507128 | 0.048902345 |
| READ | T cells gamma delta          | 0.175168054  | 0.030333058 |
| READ | NK cells resting             | -0.149909249 | 0.064380721 |
| READ | NK cells activated           | -0.093527501 | 0.250182392 |
| READ | Monocytes                    | -0.01407849  | 0.862870139 |
| READ | Macrophages M0               | 0.14003185   | 0.084273581 |
| READ | Macrophages M1               | 0.188367445  | 0.019712117 |
| READ | Macrophages M2               | 0.047351608  | 0.561085482 |
| READ | Dendritic cells resting      | -0.152188245 | 0.060383714 |
| READ | Dendritic cells activated    | -0.073511853 | 0.366495605 |
| READ | Mast cells resting           | 0.018794242  | 0.81763657  |
| READ | Mast cells activated         | -0.055907606 | 0.492457852 |
| READ | Eosinophils                  | -0.168354714 | 0.037504701 |
| READ | Neutrophils                  | -0.149981178 | 0.064251345 |
| SARC | B cells naive                | 0.040417288  | 0.534063918 |
| SARC | B cells memory               | -0.03601251  | 0.579578309 |
| SARC | Plasma cells                 | 0.027275069  | 0.674829034 |
| SARC | T cells CD8                  | 0.07730604   | 0.233795236 |
| SARC | T cells CD4 naive            | 0            | NA          |
| SARC | T cells CD4 memory resting   | -0.016303059 | 0.802019411 |
| SARC | T cells CD4 memory activated | 0.025729283  | 0.692292998 |
| SARC | T cells follicular helper    | 0.078060779  | 0.22924774  |
| SARC | T cells regulatory (Tregs)   | 0.005670607  | 0.93050734  |
| SARC | T cells gamma delta          | 0.003706253  | 0.954547518 |
| SARC | NK cells resting             | 0.072769582  | 0.262467242 |
| SARC | NK cells activated           | 0.035961049  | 0.580120565 |
| SARC | Monocytes                    | -0.073019915 | 0.260824769 |
| SARC | Macrophages M0               | -0.021959715 | 0.735551718 |
| SARC | Macrophages M1               | -0.041757119 | 0.520584143 |
| SARC | Macrophages M2               | -0.021593483 | 0.739801893 |
| SARC | Dendritic cells resting      | -0.032203441 | 0.620337904 |
| SARC | Dendritic cells activated    | 0.023413965  | 0.718755332 |
| SARC | Mast cells resting           | 0.004343075  | 0.946748395 |

|      |                              |              |             |
|------|------------------------------|--------------|-------------|
| SARC | Mast cells activated         | -0.00540819  | 0.93371568  |
| SARC | Eosinophils                  | -0.108509228 | 0.094196957 |
| SARC | Neutrophils                  | -0.064080623 | 0.323896223 |
| SKCM | B cells naive                | 0.085511089  | 0.078610511 |
| SKCM | B cells memory               | 0.072167943  | 0.137921178 |
| SKCM | Plasma cells                 | 0.017942326  | 0.712579412 |
| SKCM | T cells CD8                  | 0.000516931  | 0.991532343 |
| SKCM | T cells CD4 naive            | 0            | NA          |
| SKCM | T cells CD4 memory resting   | 0.136617764  | 0.004831607 |
| SKCM | T cells CD4 memory activated | 0.180640363  | 0.000184431 |
| SKCM | T cells follicular helper    | -0.001644841 | 0.973061046 |
| SKCM | T cells regulatory (Tregs)   | -0.135831336 | 0.005083772 |
| SKCM | T cells gamma delta          | 0.157996711  | 0.001097454 |
| SKCM | NK cells resting             | -0.092592604 | 0.056771729 |
| SKCM | NK cells activated           | -0.044121385 | 0.364790703 |
| SKCM | Monocytes                    | -0.109856705 | 0.023681276 |
| SKCM | Macrophages M0               | -0.112331557 | 0.020692599 |
| SKCM | Macrophages M1               | 0.226000606  | 2.59E-06    |
| SKCM | Macrophages M2               | -0.139896613 | 0.003897384 |
| SKCM | Dendritic cells resting      | -0.034471524 | 0.47899053  |
| SKCM | Dendritic cells activated    | -0.010908097 | 0.822792279 |
| SKCM | Mast cells resting           | -0.022341513 | 0.646421543 |
| SKCM | Mast cells activated         | -0.01634286  | 0.737210958 |
| SKCM | Eosinophils                  | -0.079668978 | 0.101370251 |
| SKCM | Neutrophils                  | -0.00954514  | 0.844633094 |
| STAD | B cells naive                | 0.17728022   | 0.000602814 |
| STAD | B cells memory               | -0.060141857 | 0.247864798 |
| STAD | Plasma cells                 | -0.00880115  | 0.86583334  |
| STAD | T cells CD8                  | -0.053815568 | 0.301223843 |
| STAD | T cells CD4 naive            | 0            | NA          |
| STAD | T cells CD4 memory resting   | 0.049537631  | 0.341337108 |
| STAD | T cells CD4 memory activated | -0.166641144 | 0.001275405 |
| STAD | T cells follicular helper    | 0.064100881  | 0.218034687 |
| STAD | T cells regulatory (Tregs)   | 0.09346218   | 0.072165683 |
| STAD | T cells gamma delta          | -0.032833461 | 0.528398224 |
| STAD | NK cells resting             | -0.07047985  | 0.175531695 |
| STAD | NK cells activated           | 0.106757668  | 0.039856234 |
| STAD | Monocytes                    | -0.07710586  | 0.138244624 |
| STAD | Macrophages M0               | 0.153030794  | 0.003126093 |
| STAD | Macrophages M1               | 0.045814032  | 0.378900007 |
| STAD | Macrophages M2               | -0.079196792 | 0.127838062 |
| STAD | Dendritic cells resting      | -0.014247087 | 0.784464179 |
| STAD | Dendritic cells activated    | -0.092297043 | 0.075805601 |
| STAD | Mast cells resting           | 0.040858586  | 0.432650623 |
| STAD | Mast cells activated         | -0.102493663 | 0.048529358 |
| STAD | Eosinophils                  | -0.15009426  | 0.003759146 |
| STAD | Neutrophils                  | -0.170157794 | 0.001000315 |
| TGCT | B cells naive                | 0.178112363  | 0.027615576 |
| TGCT | B cells memory               | -0.008387103 | 0.918047285 |
| TGCT | Plasma cells                 | -0.02771933  | 0.733764094 |
| TGCT | T cells CD8                  | -0.20242553  | 0.012094801 |
| TGCT | T cells CD4 naive            | 0            | NA          |
| TGCT | T cells CD4 memory resting   | 0.404570525  | 2.14E-07    |
| TGCT | T cells CD4 memory activated | 0.034127971  | 0.67536242  |
| TGCT | T cells follicular helper    | -0.268960253 | 0.000774537 |

|      |                              |              |             |
|------|------------------------------|--------------|-------------|
| TGCT | T cells regulatory (Tregs)   | 0.218961145  | 0.00654266  |
| TGCT | T cells gamma delta          | 0.079117998  | 0.330983448 |
| TGCT | NK cells resting             | -0.129380688 | 0.110950947 |
| TGCT | NK cells activated           | -0.308864573 | 0.000102529 |
| TGCT | Monocytes                    | -0.110764825 | 0.17286754  |
| TGCT | Macrophages M0               | 0.060404006  | 0.458265106 |
| TGCT | Macrophages M1               | -0.082008634 | 0.3135646   |
| TGCT | Macrophages M2               | -0.153987021 | 0.057374744 |
| TGCT | Dendritic cells resting      | 0.082643112  | 0.309822694 |
| TGCT | Dendritic cells activated    | -0.21719528  | 0.007001003 |
| TGCT | Mast cells resting           | 0.021409586  | 0.792796996 |
| TGCT | Mast cells activated         | 0            | NA          |
| TGCT | Eosinophils                  | -0.251366698 | 0.001723131 |
| TGCT | Neutrophils                  | -0.066061877 | 0.417178563 |
| THCA | B cells naive                | -0.048755389 | 0.334411516 |
| THCA | B cells memory               | 0.057121143  | 0.257994635 |
| THCA | Plasma cells                 | -0.033053828 | 0.512986855 |
| THCA | T cells CD8                  | 0.149839451  | 0.002867195 |
| THCA | T cells CD4 naive            | 0            | NA          |
| THCA | T cells CD4 memory resting   | -0.113949243 | 0.023696547 |
| THCA | T cells CD4 memory activated | -0.034255817 | 0.497773488 |
| THCA | T cells follicular helper    | 0.016672647  | 0.741464913 |
| THCA | T cells regulatory (Tregs)   | -0.110212754 | 0.028714975 |
| THCA | T cells gamma delta          | 0.083007984  | 0.099914791 |
| THCA | NK cells resting             | 0.097585222  | 0.05293158  |
| THCA | NK cells activated           | 0.057020049  | 0.258839423 |
| THCA | Monocytes                    | -0.004342399 | 0.931529448 |
| THCA | Macrophages M0               | -0.047592368 | 0.346083052 |
| THCA | Macrophages M1               | 0.095026035  | 0.059499217 |
| THCA | Macrophages M2               | 0.079984377  | 0.112934354 |
| THCA | Dendritic cells resting      | -0.033292575 | 0.509945997 |
| THCA | Dendritic cells activated    | -0.12992332  | 0.009832595 |
| THCA | Mast cells resting           | -0.069389909 | 0.169245688 |
| THCA | Mast cells activated         | 0.058581992  | 0.245999407 |
| THCA | Eosinophils                  | 0.080753351  | 0.109503199 |
| THCA | Neutrophils                  | -0.129552944 | 0.010046078 |
| THYM | B cells naive                | -0.018299525 | 0.844074756 |
| THYM | B cells memory               | -0.17043519  | 0.065006057 |
| THYM | Plasma cells                 | -0.189830927 | 0.039503728 |
| THYM | T cells CD8                  | -0.083052481 | 0.3712561   |
| THYM | T cells CD4 naive            | 0.146117851  | 0.114373716 |
| THYM | T cells CD4 memory resting   | 0.362279786  | 5.55E-05    |
| THYM | T cells CD4 memory activated | -0.070808506 | 0.446092055 |
| THYM | T cells follicular helper    | -0.035709042 | 0.701057982 |
| THYM | T cells regulatory (Tregs)   | -0.099399429 | 0.284207795 |
| THYM | T cells gamma delta          | -0.172402611 | 0.061923982 |
| THYM | NK cells resting             | 0.111308289  | 0.230147456 |
| THYM | NK cells activated           | -0.04619471  | 0.619381924 |
| THYM | Monocytes                    | -0.119032214 | 0.199202852 |
| THYM | Macrophages M0               | -0.134448213 | 0.146631379 |
| THYM | Macrophages M1               | -0.036638718 | 0.693659393 |
| THYM | Macrophages M2               | -0.318271364 | 0.000444245 |
| THYM | Dendritic cells resting      | 0.1850362    | 0.044859667 |
| THYM | Dendritic cells activated    | -0.03923025  | 0.673188831 |
| THYM | Mast cells resting           | -0.011898259 | 0.898246456 |

|      |                              |              |             |
|------|------------------------------|--------------|-------------|
| THYM | Mast cells activated         | -0.036938736 | 0.691277867 |
| THYM | Eosinophils                  | -0.06028881  | 0.516646856 |
| THYM | Neutrophils                  | -0.075790878 | 0.414666228 |
| UCEC | B cells naive                | 0.020062132  | 0.659080236 |
| UCEC | B cells memory               | 0.046623711  | 0.305009509 |
| UCEC | Plasma cells                 | -0.094763411 | 0.036759949 |
| UCEC | T cells CD8                  | -0.085420245 | 0.059874665 |
| UCEC | T cells CD4 naive            | 0            | NA          |
| UCEC | T cells CD4 memory resting   | 0.088688671  | 0.050701797 |
| UCEC | T cells CD4 memory activated | -0.064174277 | 0.157784728 |
| UCEC | T cells follicular helper    | 0.172505897  | 0.00013245  |
| UCEC | T cells regulatory (Tregs)   | -0.130421866 | 0.00397536  |
| UCEC | T cells gamma delta          | 0.099887636  | 0.027672189 |
| UCEC | NK cells resting             | -0.037227114 | 0.412867746 |
| UCEC | NK cells activated           | -0.041422418 | 0.362182766 |
| UCEC | Monocytes                    | -0.03912544  | 0.38943373  |
| UCEC | Macrophages M0               | 0.015943742  | 0.725885854 |
| UCEC | Macrophages M1               | 0.045562396  | 0.316162171 |
| UCEC | Macrophages M2               | -0.03216715  | 0.479258937 |
| UCEC | Dendritic cells resting      | -0.055931864 | 0.218386731 |
| UCEC | Dendritic cells activated    | 0.146473361  | 0.001202732 |
| UCEC | Mast cells resting           | 0.030956169  | 0.495968173 |
| UCEC | Mast cells activated         | -0.068390642 | 0.132174929 |
| UCEC | Eosinophils                  | -0.016272563 | 0.720466645 |
| UCEC | Neutrophils                  | -0.054756022 | 0.228236302 |
| UCS  | B cells naive                | 0.039480296  | 0.811395957 |
| UCS  | B cells memory               | -0.165314317 | 0.314540715 |
| UCS  | Plasma cells                 | -0.254204341 | 0.118374539 |
| UCS  | T cells CD8                  | 0.001247158  | 0.993987926 |
| UCS  | T cells CD4 naive            | 0            | NA          |
| UCS  | T cells CD4 memory resting   | -0.015552012 | 0.925134626 |
| UCS  | T cells CD4 memory activated | -0.01398974  | 0.932637083 |
| UCS  | T cells follicular helper    | -0.057311038 | 0.728931162 |
| UCS  | T cells regulatory (Tregs)   | -0.007669027 | 0.96304288  |
| UCS  | T cells gamma delta          | -0.021264093 | 0.897762724 |
| UCS  | NK cells resting             | 0.124378214  | 0.450605057 |
| UCS  | NK cells activated           | 0.20941372   | 0.200727766 |
| UCS  | Monocytes                    | 0.142951333  | 0.385308731 |
| UCS  | Macrophages M0               | 0.037173521  | 0.822233639 |
| UCS  | Macrophages M1               | -0.052738892 | 0.749832242 |
| UCS  | Macrophages M2               | 0.135301065  | 0.411503745 |
| UCS  | Dendritic cells resting      | -0.248115748 | 0.127759603 |
| UCS  | Dendritic cells activated    | 0.030632715  | 0.853134548 |
| UCS  | Mast cells resting           | -0.146696268 | 0.372850743 |
| UCS  | Mast cells activated         | -0.219422027 | 0.1795538   |
| UCS  | Eosinophils                  | -0.043314974 | 0.79345726  |
| UCS  | Neutrophils                  | 0.012351389  | 0.940511051 |
| UVM  | B cells naive                | 0.040243565  | 0.810417083 |
| UVM  | B cells memory               | 0.118821233  | 0.477382682 |
| UVM  | Plasma cells                 | -0.123679885 | 0.459425617 |
| UVM  | T cells CD8                  | 0.179690283  | 0.280365116 |
| UVM  | T cells CD4 naive            | 0            | NA          |
| UVM  | T cells CD4 memory resting   | 0.008730789  | 0.958510166 |
| UVM  | T cells CD4 memory activated | 0.351317088  | 0.03055743  |
| UVM  | T cells follicular helper    | 0.39371551   | 0.014459685 |

|     |                            |              |             |
|-----|----------------------------|--------------|-------------|
| UVM | T cells regulatory (Tregs) | -0.006487253 | 0.969165776 |
| UVM | T cells gamma delta        | 0.093814632  | 0.575321446 |
| UVM | NK cells resting           | 0.080871848  | 0.629332846 |
| UVM | NK cells activated         | -0.188125725 | 0.258021199 |
| UVM | Monocytes                  | -0.397974671 | 0.013342258 |
| UVM | Macrophages M0             | 0.092255775  | 0.581714359 |
| UVM | Macrophages M1             | 0.294079495  | 0.073111639 |
| UVM | Macrophages M2             | -0.341518439 | 0.03586174  |
| UVM | Dendritic cells resting    | 0.007687551  | 0.963464223 |
| UVM | Dendritic cells activated  | 0            | NA          |
| UVM | Mast cells resting         | -0.228342982 | 0.16793312  |
| UVM | Mast cells activated       | 0.257538154  | 0.118523395 |
| UVM | Eosinophils                | -0.151948682 | 0.362459541 |
| UVM | Neutrophils                | 0.300457884  | 0.066819887 |
